# Supplementary material for: RNA-Seq of Bacillus licheniformis: active regulatory RNA features expressed within a productive fermentation
Source: PubMed Central journal article supplement (PMC3871023; doi:10.1186/1471-2164-14-667), 2013-10-01
Supplement: 1471-2164-14-667-S1.pdf [file 1471-2164-14-667-S1.pdf]

# Additional File 1

## RNA-Seq of *Bacillus licheniformis*: active regulatory RNA features expressed within a productive fermentation

Sandra Wiegand, Sascha Dietrich, Robert Hertel, Johannes Bongaerts, Stefan Evers, Sonja  
Volland, Rolf Daniel and Heiko Liesegang

### Content

|                                                                      |    |
|----------------------------------------------------------------------|----|
| Figure S1 Distribution of whole transcriptome sequencing reads. .... | 2  |
| Figure S2 Comparative operon prediction. ....                        | 3  |
| Figure S3 Northern blot confirmation of non-coding RNAs. ....        | 4  |
| Figure S4 Antisense RNAs with putative impact on productivity. ....  | 13 |
| Figure S5 BsrG/SR4-like loci in <i>B. licheniformis</i> . ....       | 15 |
| Figure S6 Work flow charts. ....                                     | 16 |
| References. ....                                                     | 17 |

**Figure S1**

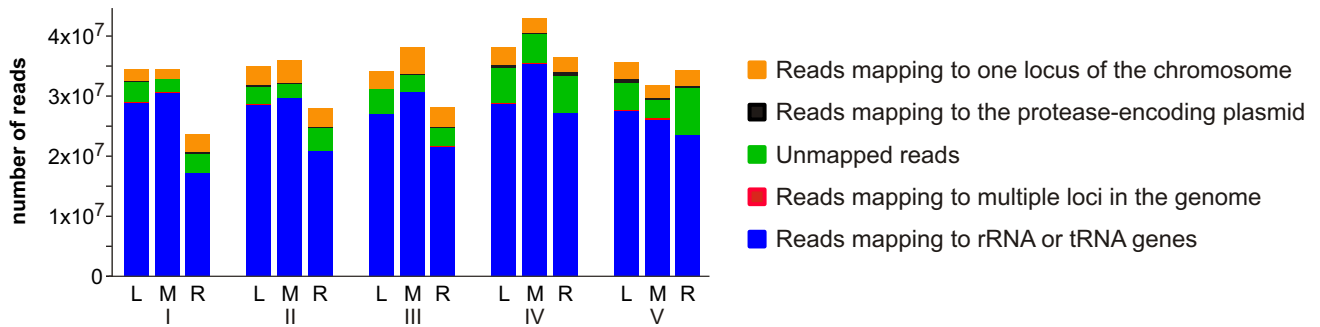

**Figure S1 Distribution of whole transcriptome sequencing reads.** Mapping results of the RNA-Seq reads to the *B. licheniformis* genome based on sequence similarity. Results are shown for replicates of the sampling points I to V. The category *unmapped reads* mainly comprises reads derived from experimental artifacts like poly(A) tails or concatenated RNA adapters, as well as reads with more than one sequencing error per 50 bp. Please note that not a single read which has been tested from this fraction can be assigned to other organisms than *B. licheniformis*.

**Figure S2**

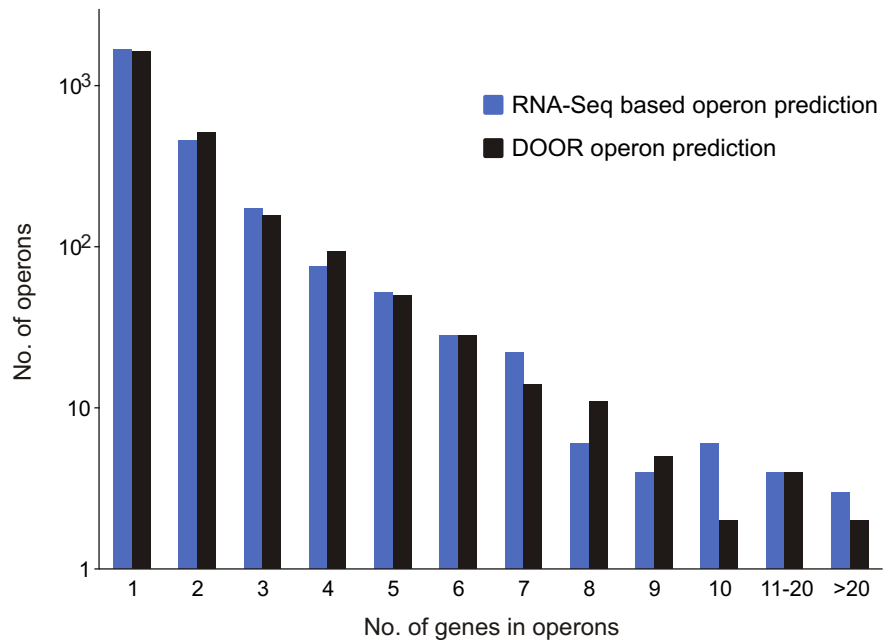

**Figure S2 Comparative operon prediction.** Number of genes in predicted operons are shown for the *in silico* prediction available at DOOR [1] (black) and the manually curated prediction based on RNA-Seq provided in this study (blue). The deviations especially in the longer operons are due to the here employed expression profile-accounting method of operon prediction. Please note that results are given on log-transformed scale.

Figure S3A

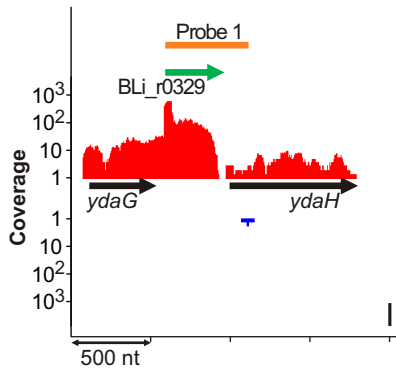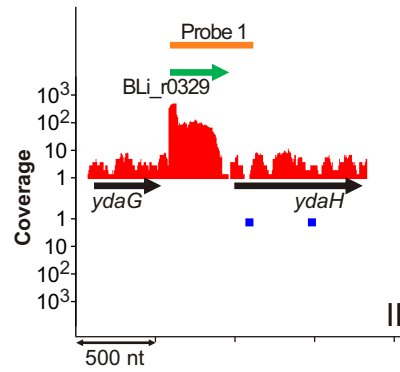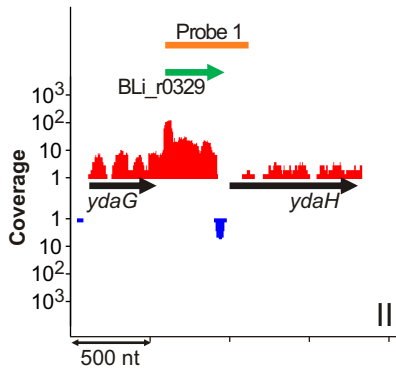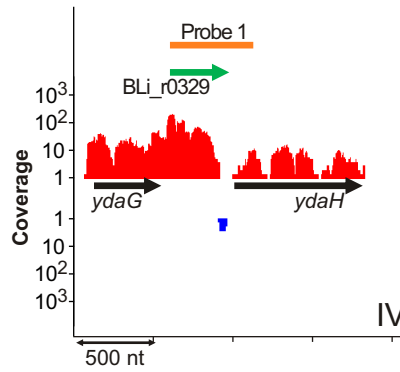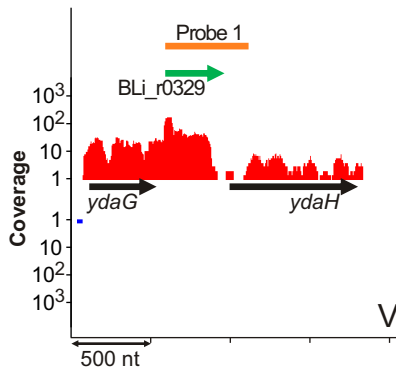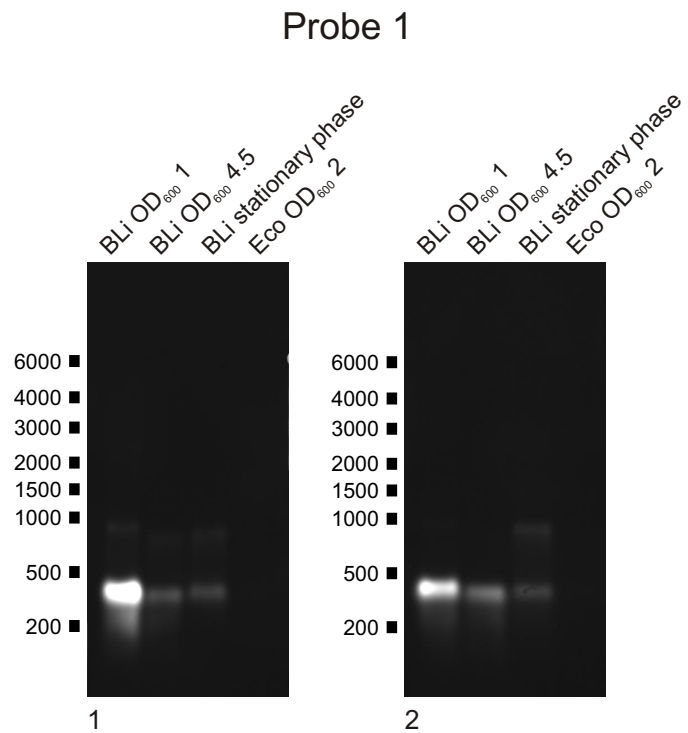

Figure S3B.1

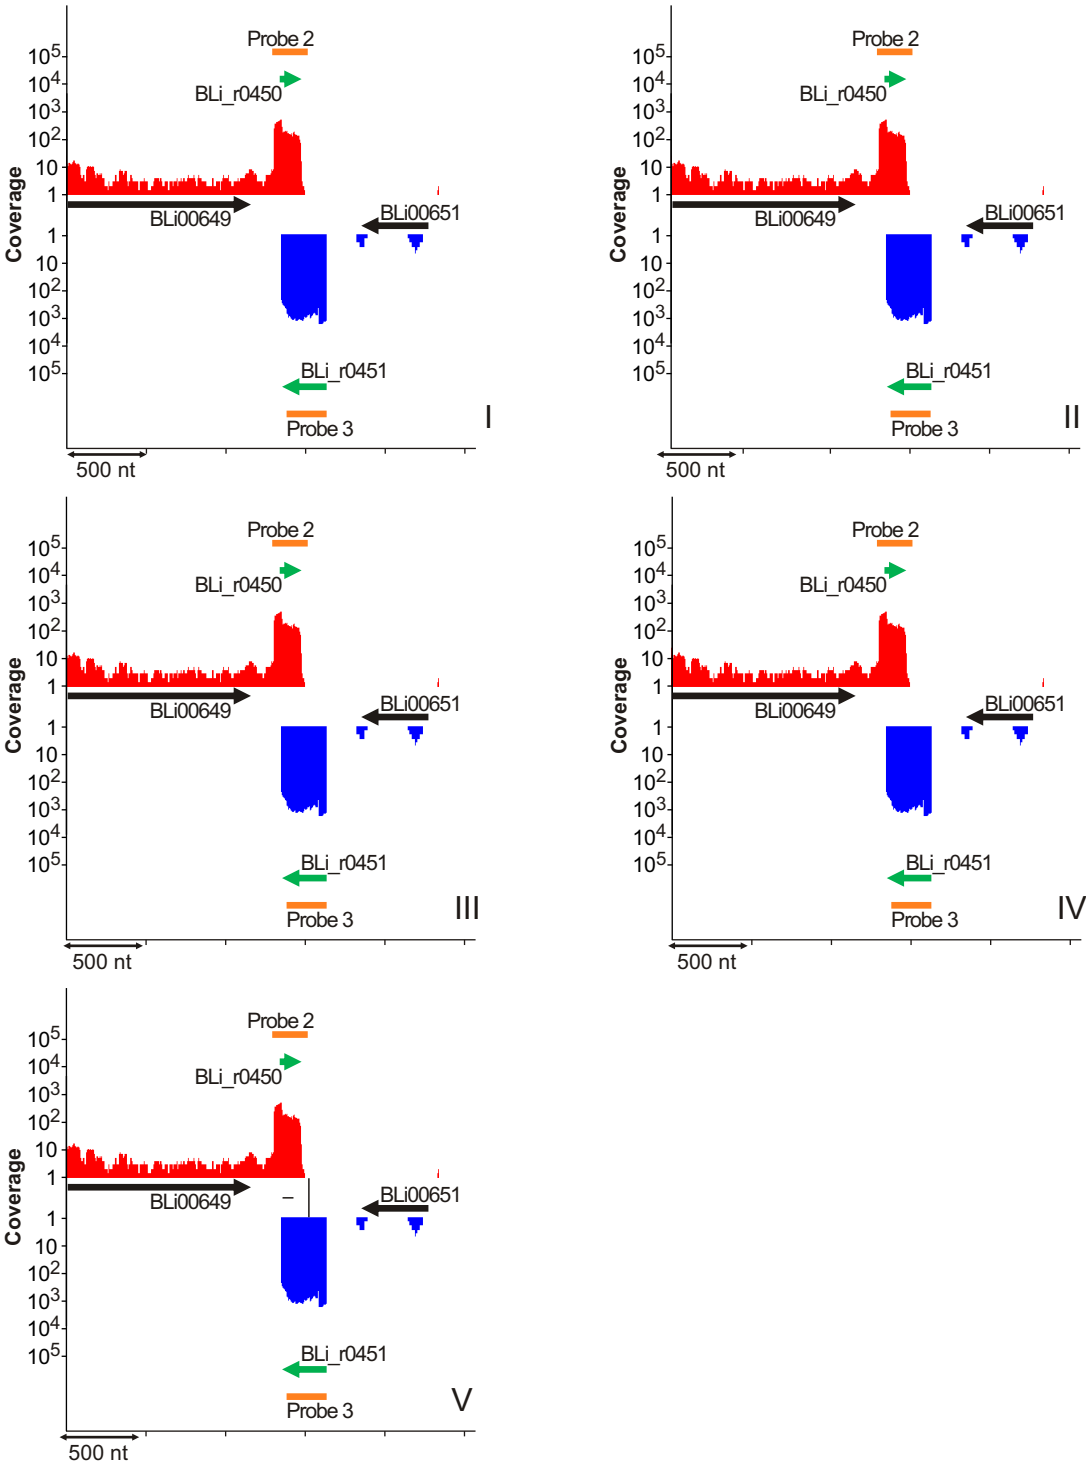

Figure S3B.2

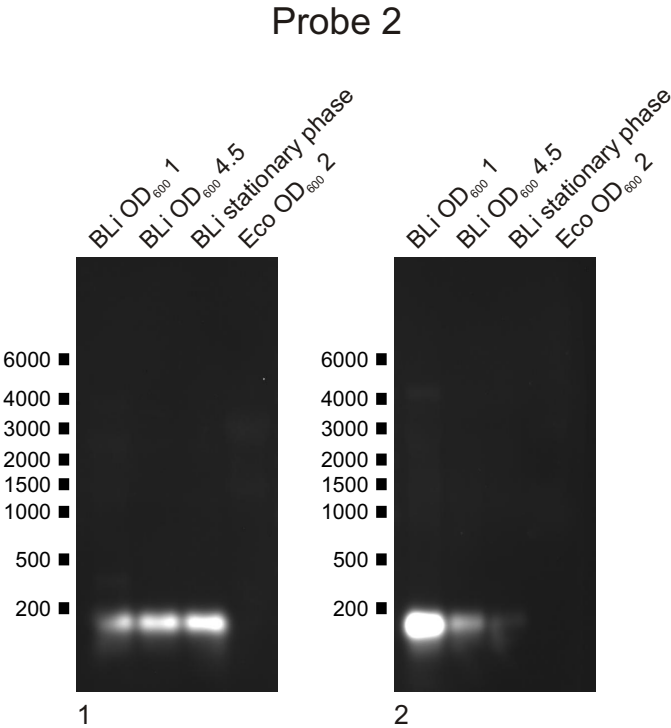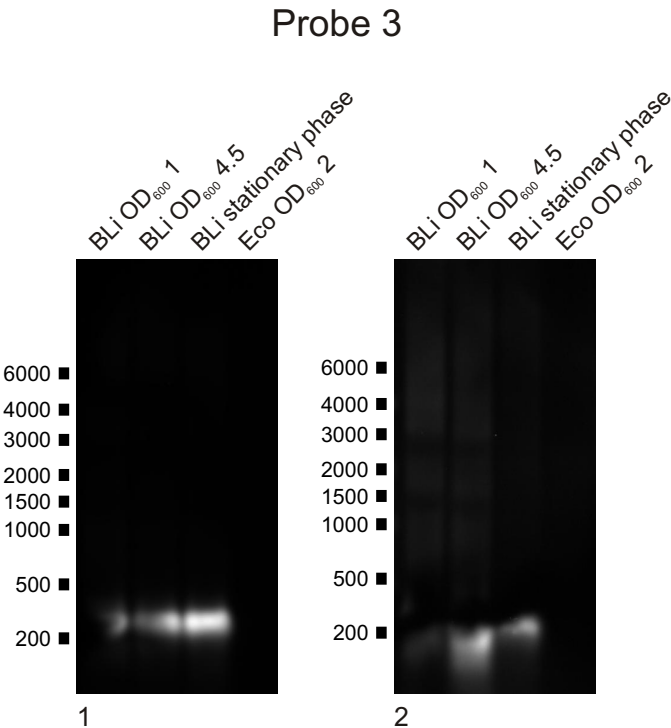

Figure S3C

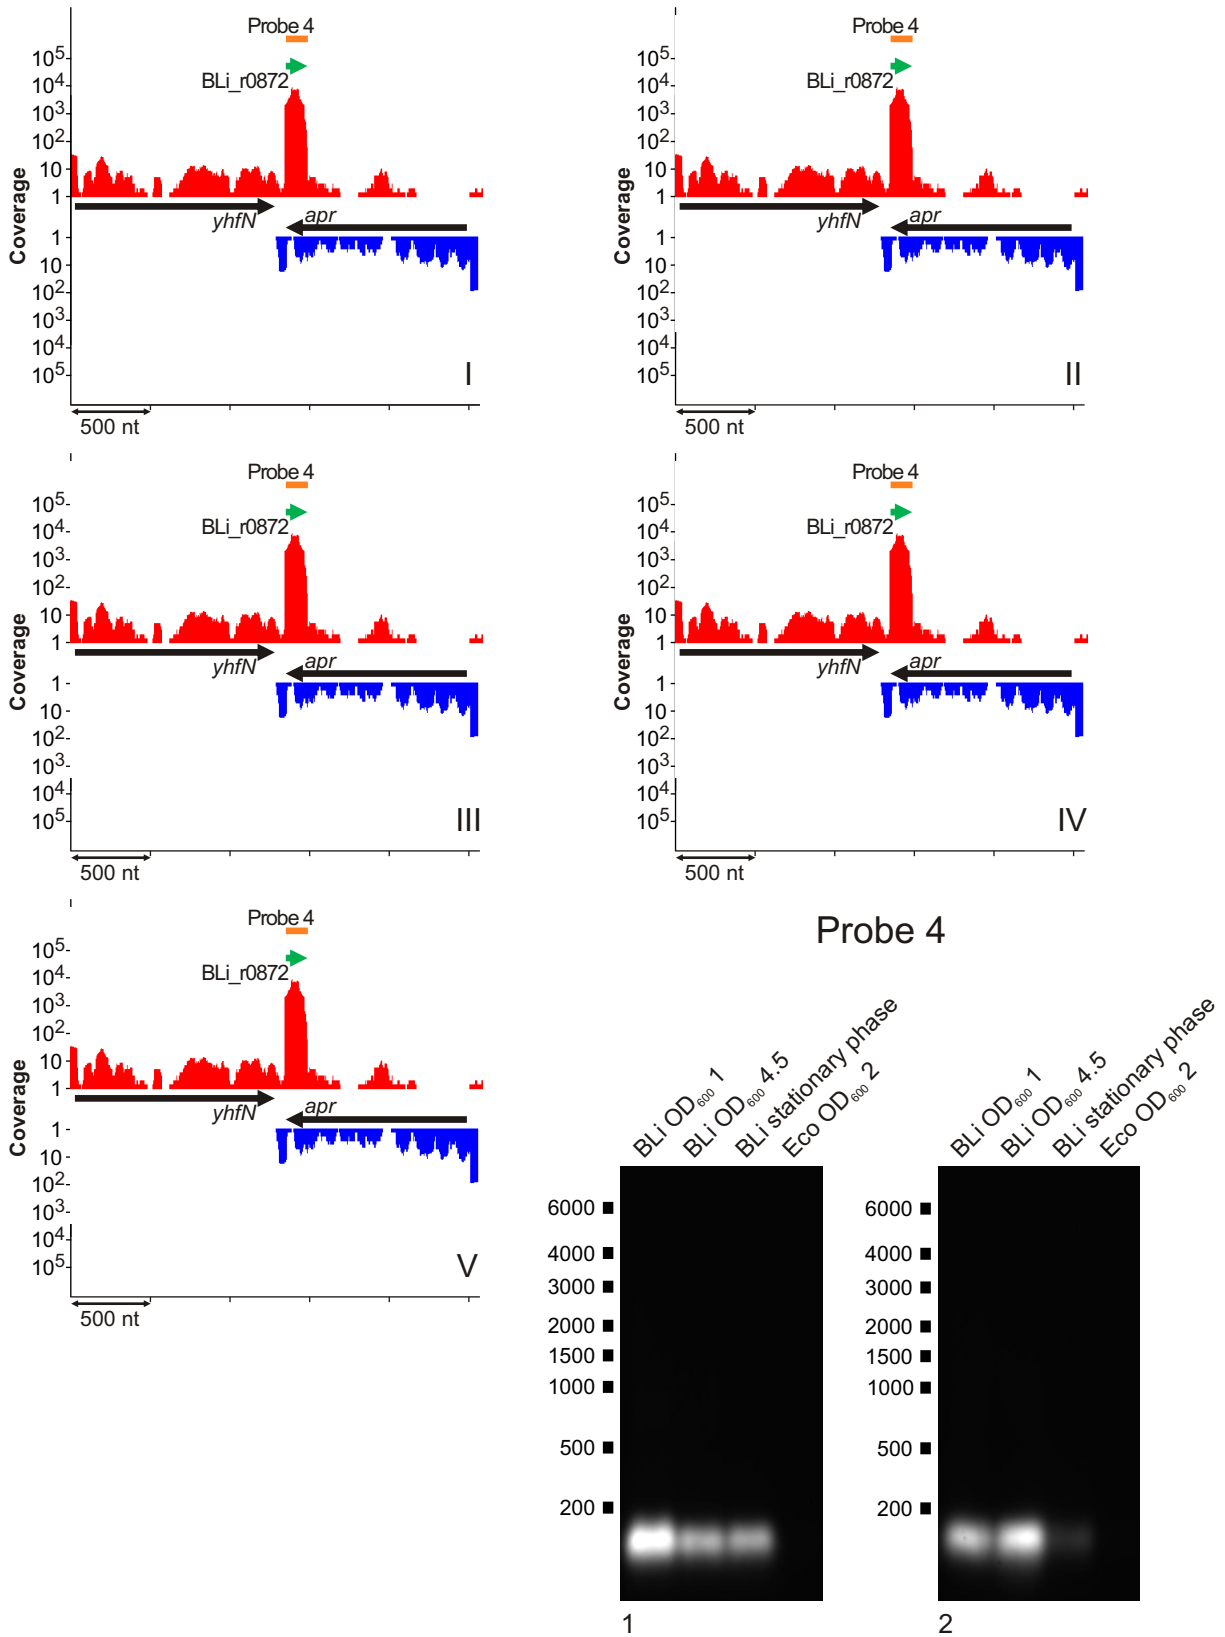

Figure S3D

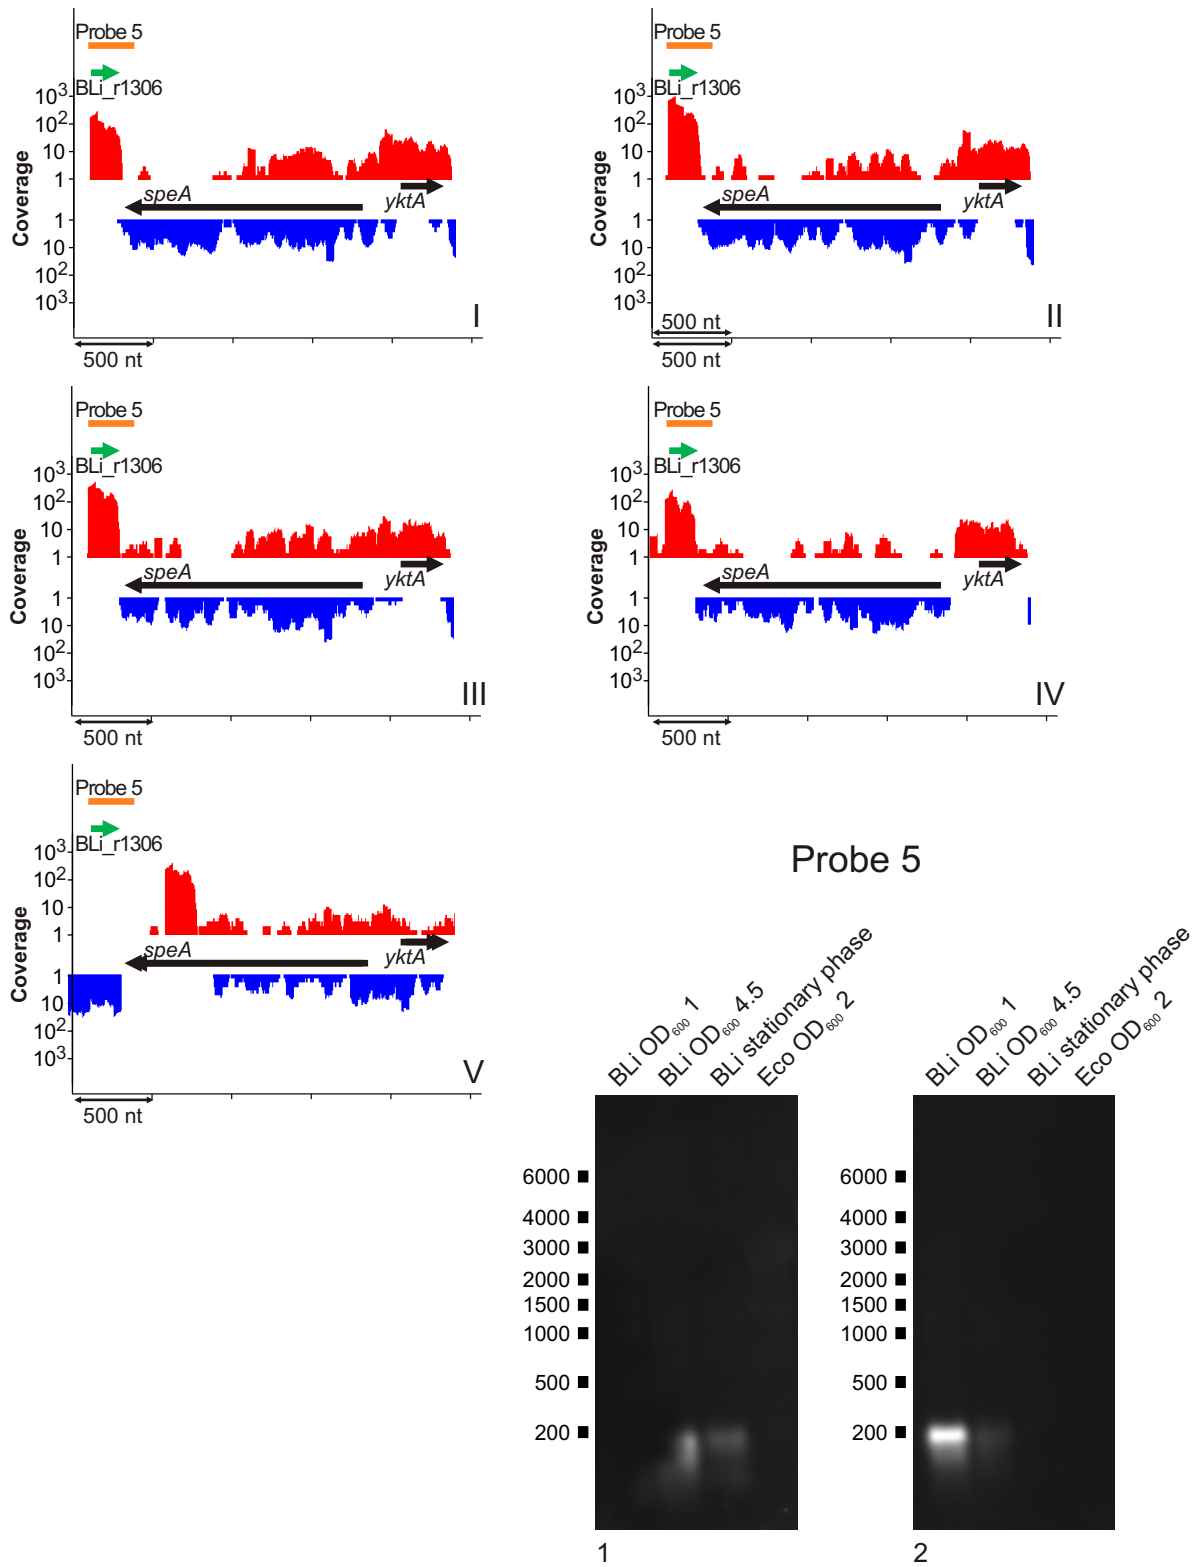



Figure S3E

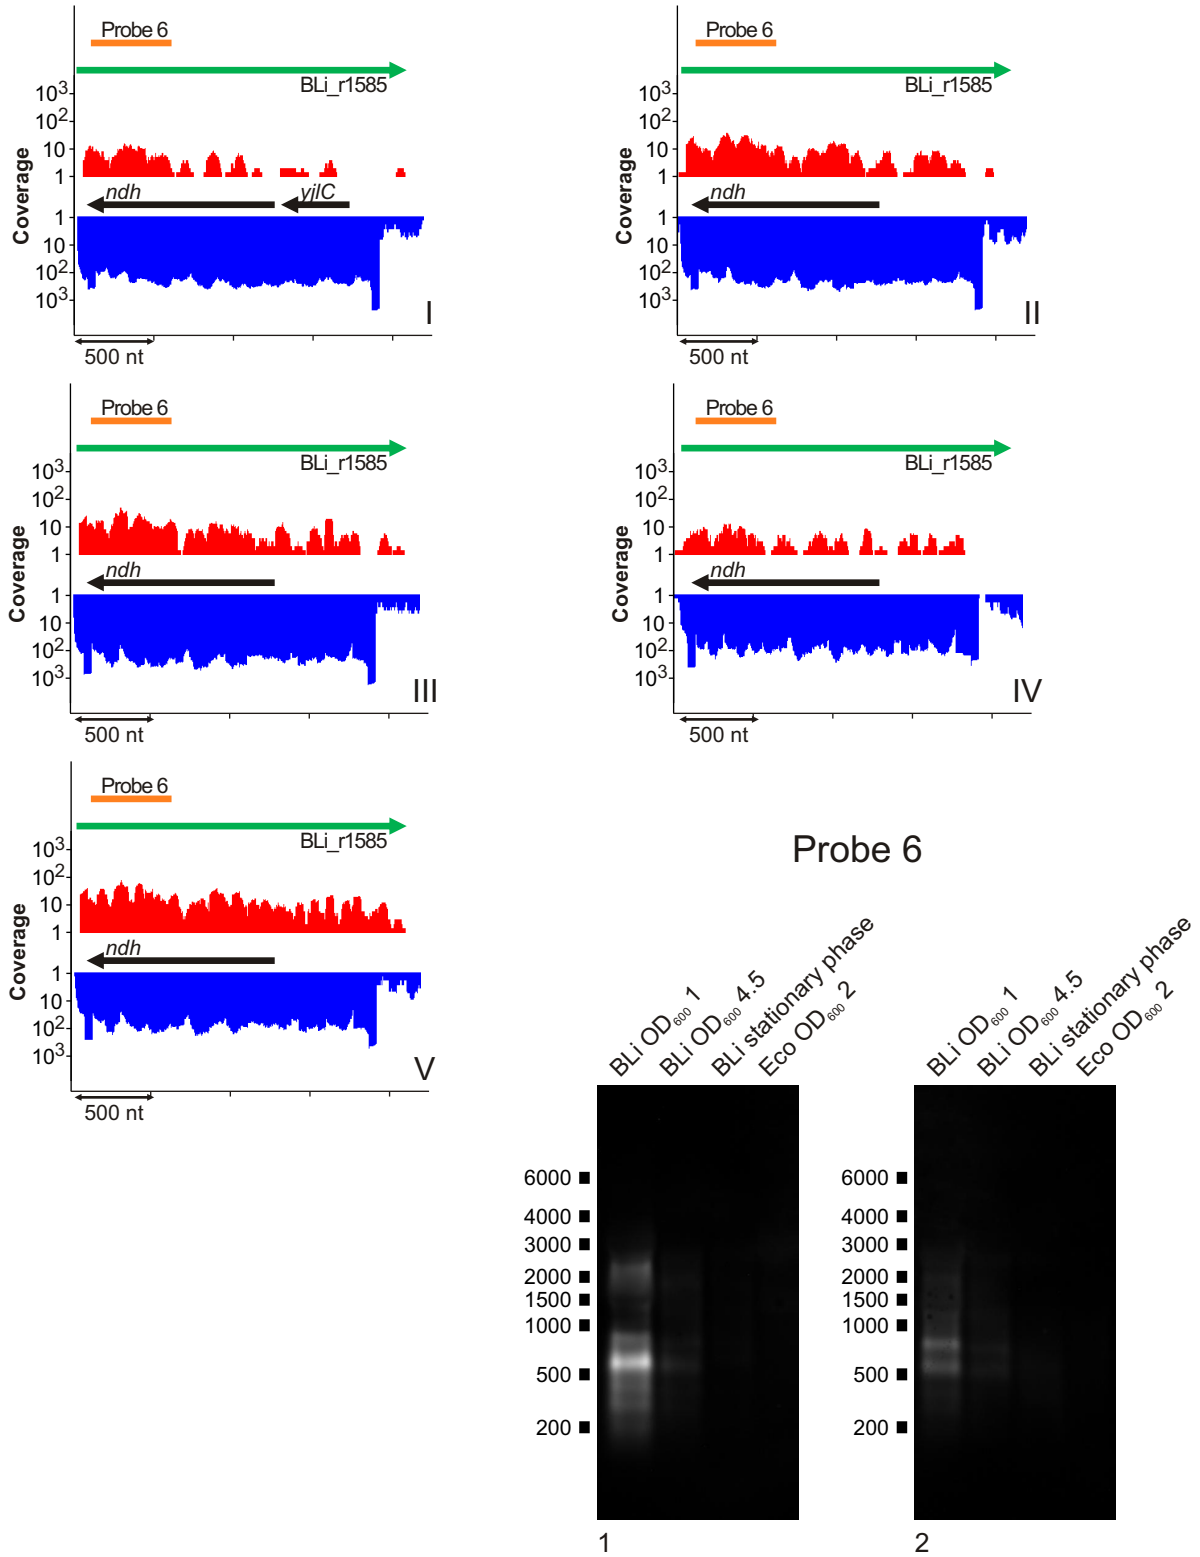

Figure S3F

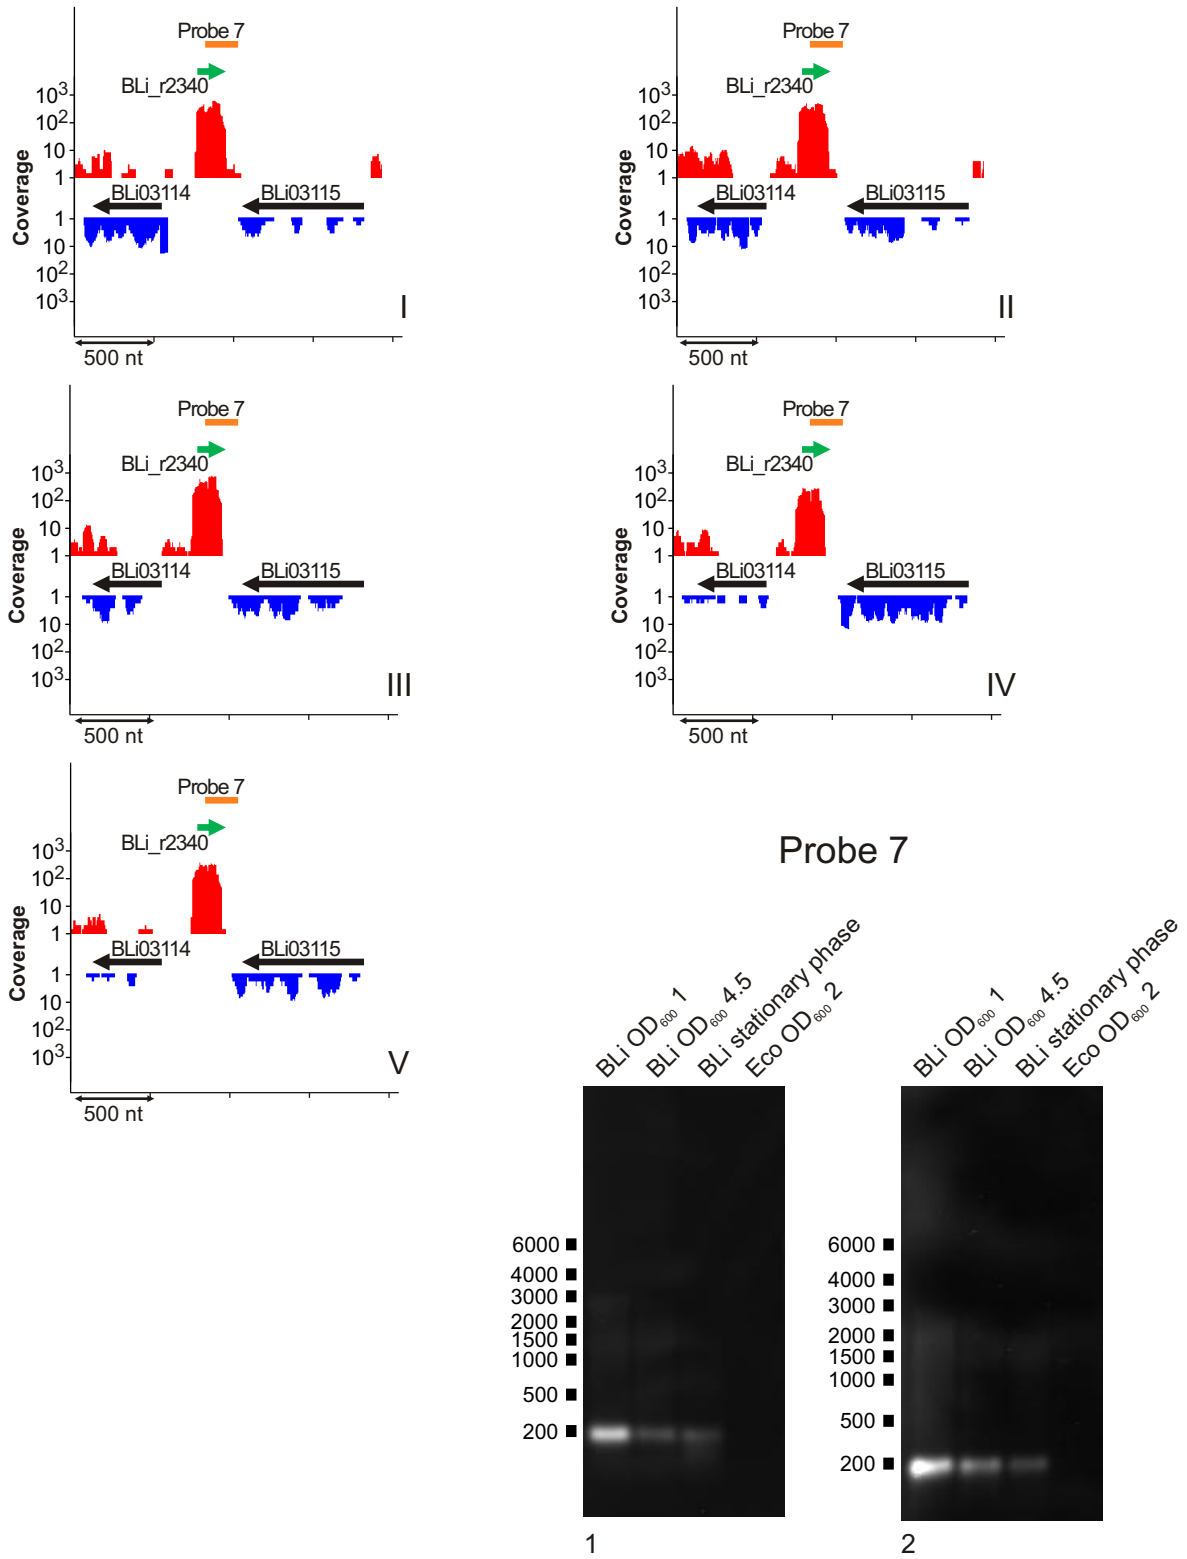

Figure S3G

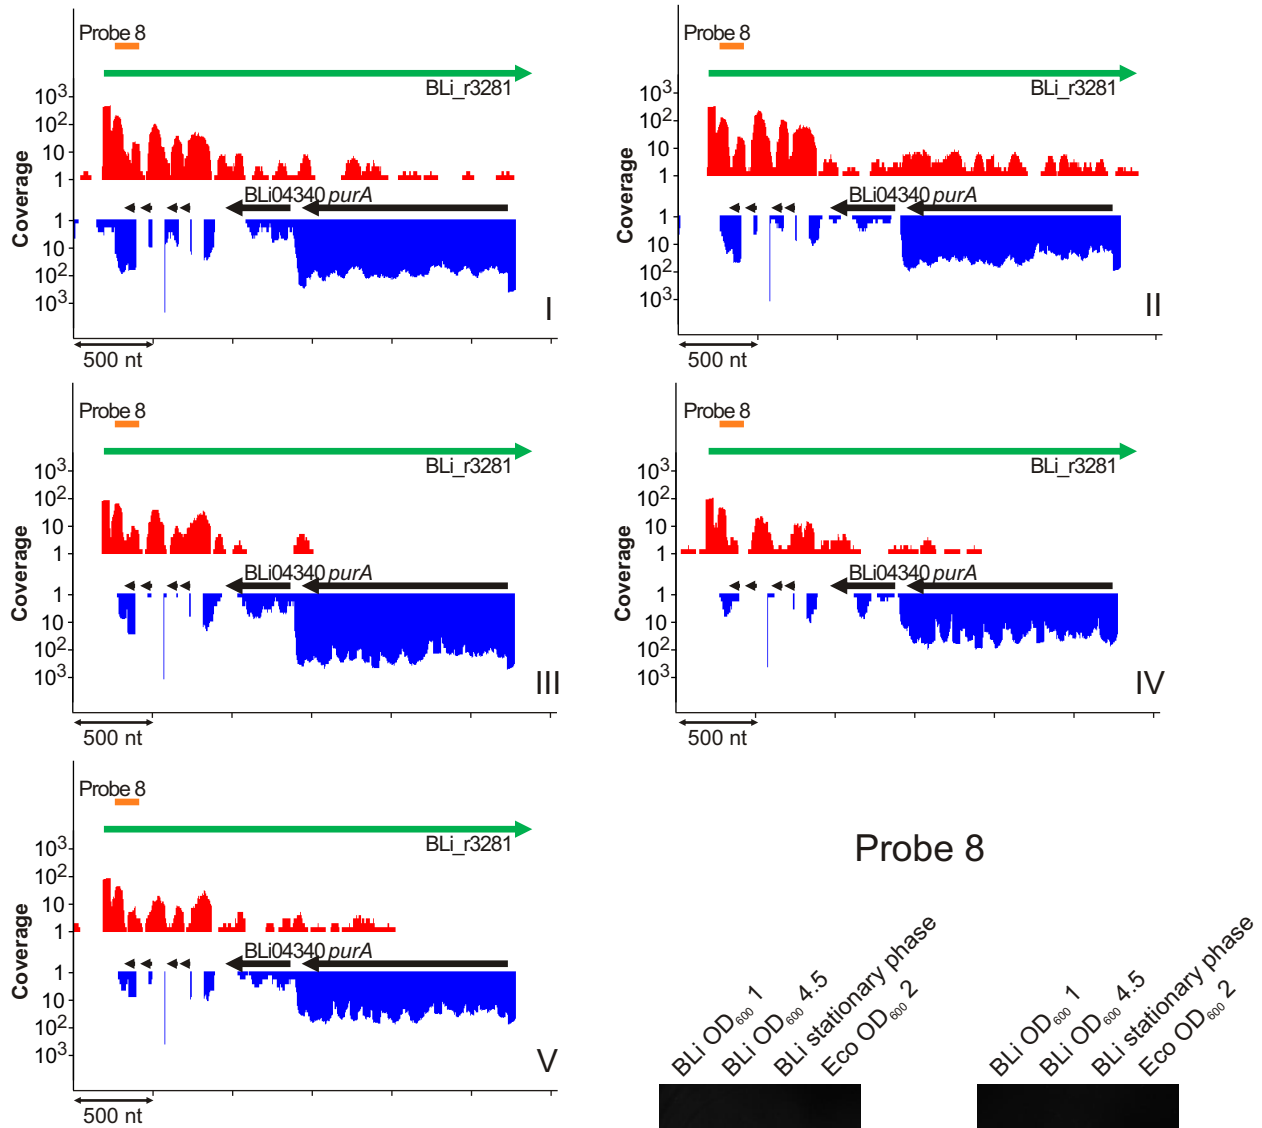

Non-labeled arrows from left to right: *trnF3*, *trnD4*, *trnE6* and *trnK3*. The gaps in coverage at the same position result from removal of reads according to tRNA genes before mapping.

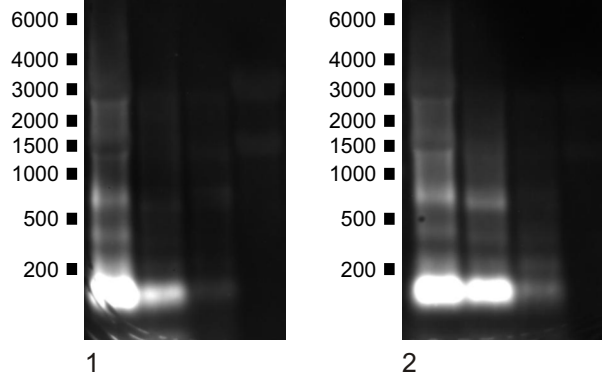

**Figure S3 Northern blot confirmation of non-coding RNAs.** For each blot the corresponding genomic loci and the transcriptional activity is shown for all sampling points. The black arrows show genes, the green arrow the respective ncRNA. Probes (Additional File 2: Table S17) are marked orange. Northern blotting was carried out as described in *Methods*. The size range is given in base pairs and the number under each picture signifies the different replicates. **(A)** *indep* RNA BLi\_r0329 (expected size: 373 bp). **(B)** *indep* RNAs BLi\_r0450 and BLi\_r0451 (expected size: 127 bp and 291 bp, respectively). **(C)** *A<sub>I</sub>* RNA BLi\_r0872 (expected size: 144 bp). This ncRNA is of special interest since it is encoded antisense to the alkaline protease Subtilisin Carlsberg. **(D)** *A<sub>misc</sub>* RNA BLi\_r1306 (expected size: 205 bp). Please note that within the same transcript an ORF was annotated “SR1-like protein”, according to the finding in *B. subtilis*, where SR1 acts as functional sRNA and encodes a protein. **(E)** *A<sub>misc</sub>* RNA BLi\_r1585 (expected size: 2072 bp). The observed bands indicate processing or degradation of the RNA transcript. **(F)** *indep* RNA BLi\_r2340 (expected size: 188 bp) **(G)** *A<sub>misc</sub>* RNA BLi\_r3281 (expected size: 2688 bp). The observed bands may indicate a fading-out of the transcription after leaky termination.

**Figure S4A-D**

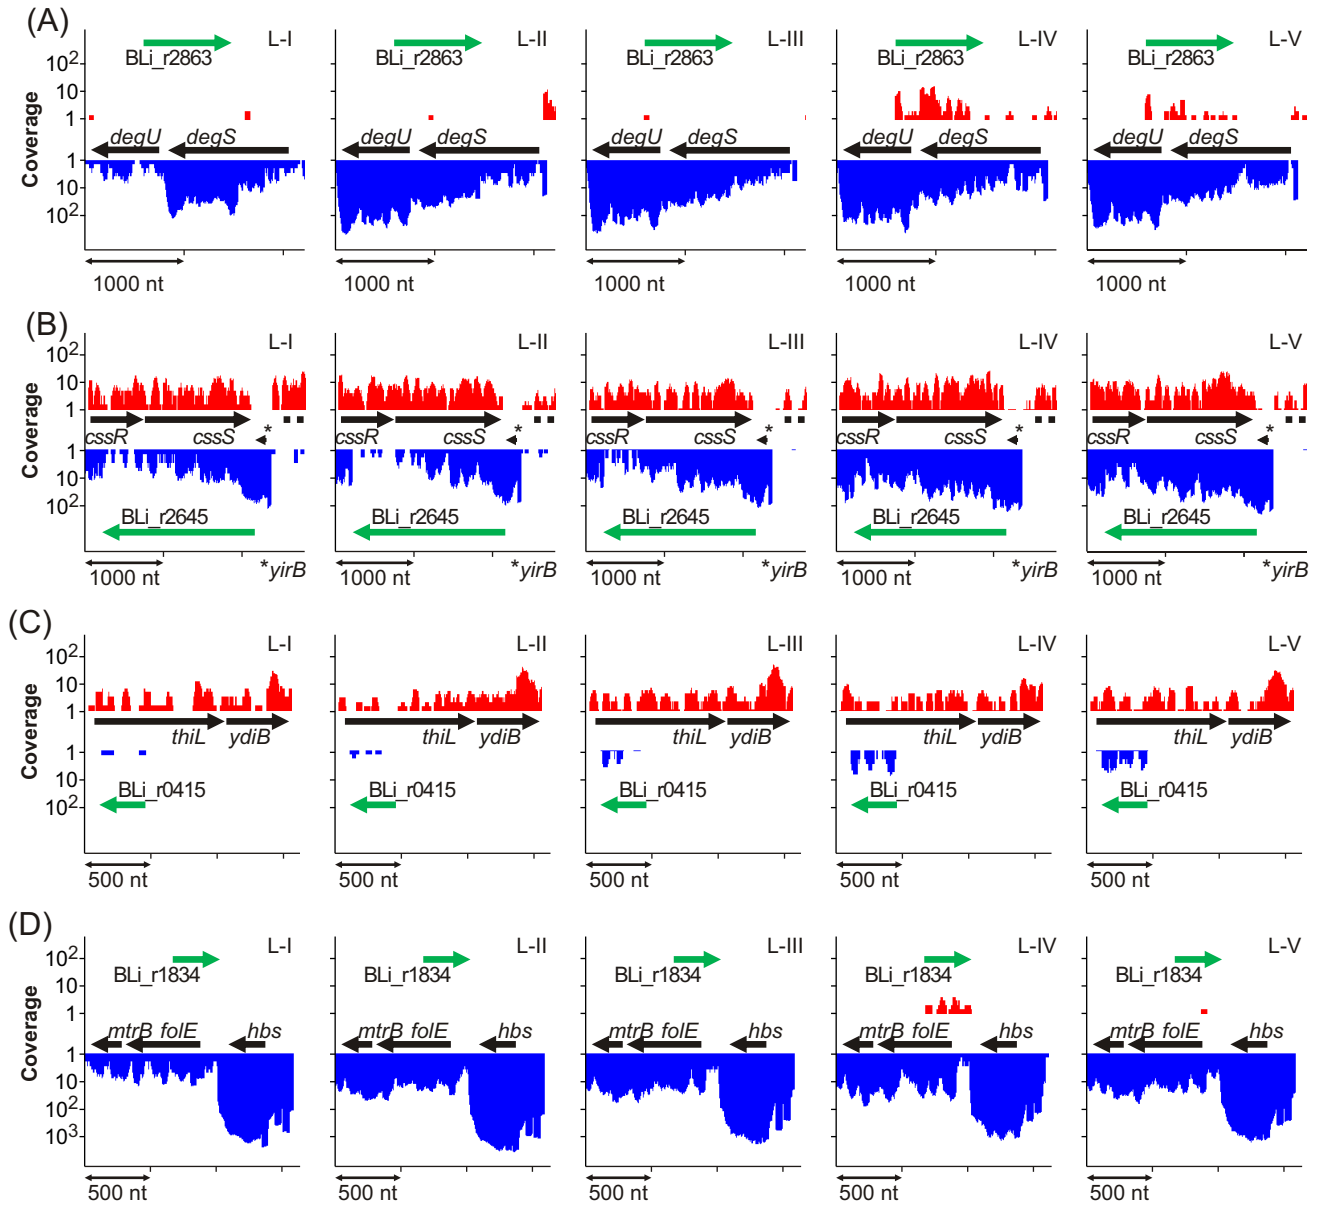

**Figure S4E-G**

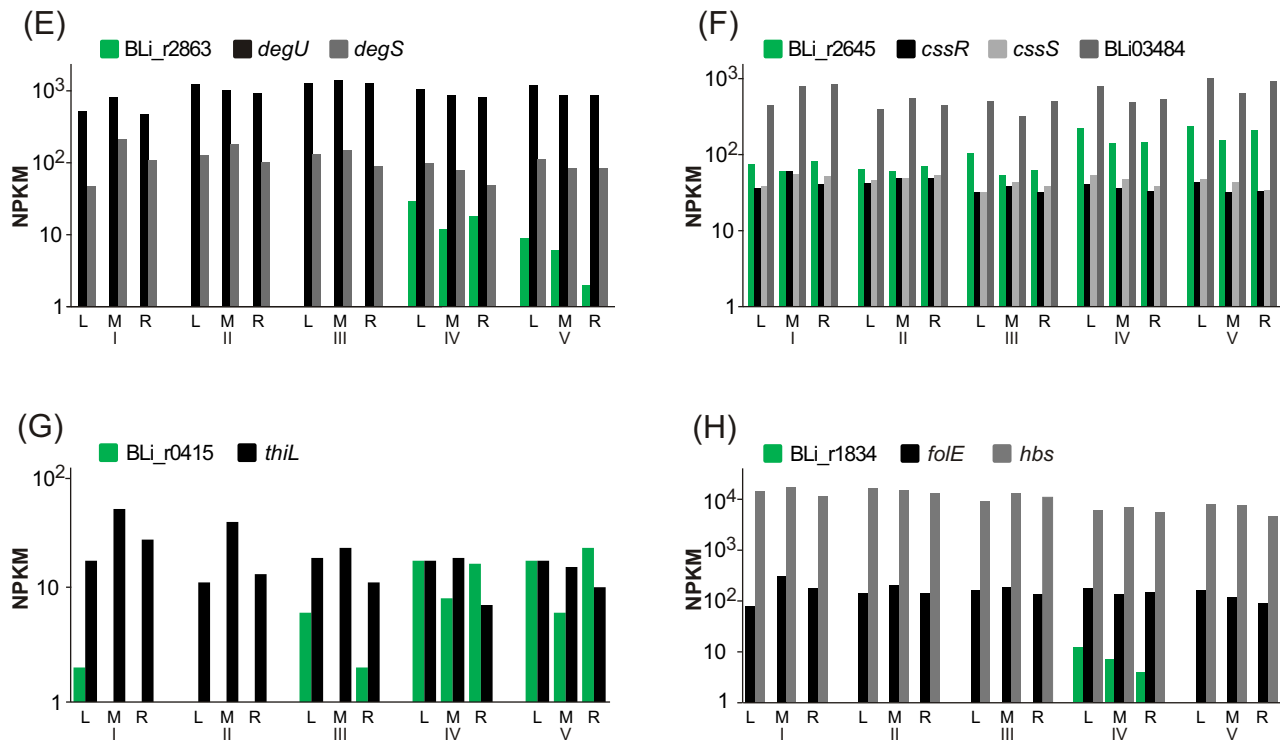

**Figure S4 Antisense RNAs with putative impact on productivity.** Antisense transcriptional activities at different fermentation stages. Black arrows indicate genes and green arrows identify antisense RNAs. (A) *A<sub>misc</sub>* RNA BLi\_r2863, (B) *A<sub>3'UTR</sub>* BLi\_r2645, (C) *A<sub>misc</sub>* RNA BLi\_r0415 and (D) *A<sub>misc</sub>* BLi\_r1834 are shown for L-I to L-V. NPKM values are displayed for all replicates of the sampling points I to V for: (E) BLi\_r2863 and the *degSU* operon, a two-component regulatory system which is involved in the manifestation of multicellular communities [2] and regulates biofilm formation, genetic competence, swarming motility, polyglutamic acid production as well as exoprotease secretion [3, 4]. As the transcript is present in the productive stages of the fermentation process, an influence on protease secretion via an impact on the *degSU* mRNA should be carefully considered. In *B. subtilis*, an ncRNA antisense to *degSU* is also annotated [5], but varies in length and start position due to a disparate genomic context. (F) BLi\_r2645 and the *cssRS* operon, a two-component regulatory system in control of the serine proteases HtrA and HtrB [6], which bear proteolytical as well as chaperone activity in response to secretion stress [7]. The overlapping 3'UTR antisense to the *cssRS* operon is generated by the proteolytical anti-adaptor protein YirB. (G) BLi\_r0415 and *thiL*, which encodes a thiamine-monophosphate kinase; (H) BLi\_r1834 and *folE*, which encodes a GTP cyclohydrolase I involved in folate biosynthesis (plus *hbs*, the adjacent DNA-binding protein HBSu). Please note that results are given on log-transformed scale.

## Figure S5

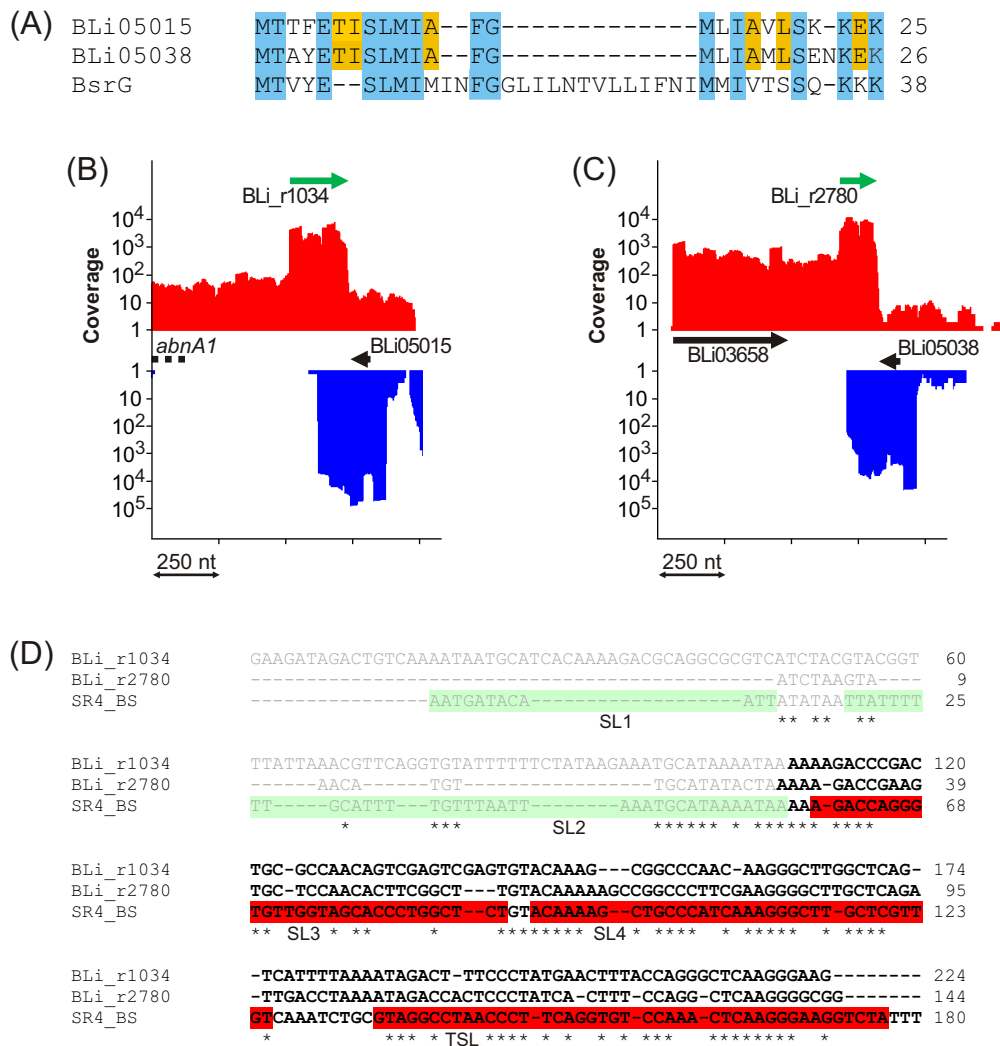

**Figure S5 BsrG/SR4-like loci in *B. licheniformis*.** (A) ClustalW2 alignment of BsrG from *B. subtilis* [8] and the peptides deduced from the newly annotated genes BLi05015 and BLi05038. Blue boxes show amino acids conserved in all three peptides and orange boxes amino acids only conserved between the two *B. licheniformis* peptides. (B) BLi05015 (1300390-1300316) indicated by the black arrow and BLi\_r1034 (green arrow). (C) Transcriptional activities of BLi05038 (3485388-3485308) indicated by the black arrow and BLi\_r2780 (green arrow). (D) ClustalW2 alignment of SR4 from *B. subtilis* [8] and *indep* RNAs BLi\_t1034 and BLi\_r2780. Nucleotides overlapping the opposite mRNA are pictured black and bold, non-overlapping nucleotides are marked gray. The green and red boxes indicate the stem loops SL1 to SL4 and TSL identified for SR4 [8] in the non-overlapping and the overlapping region, respectively.

Figure S6

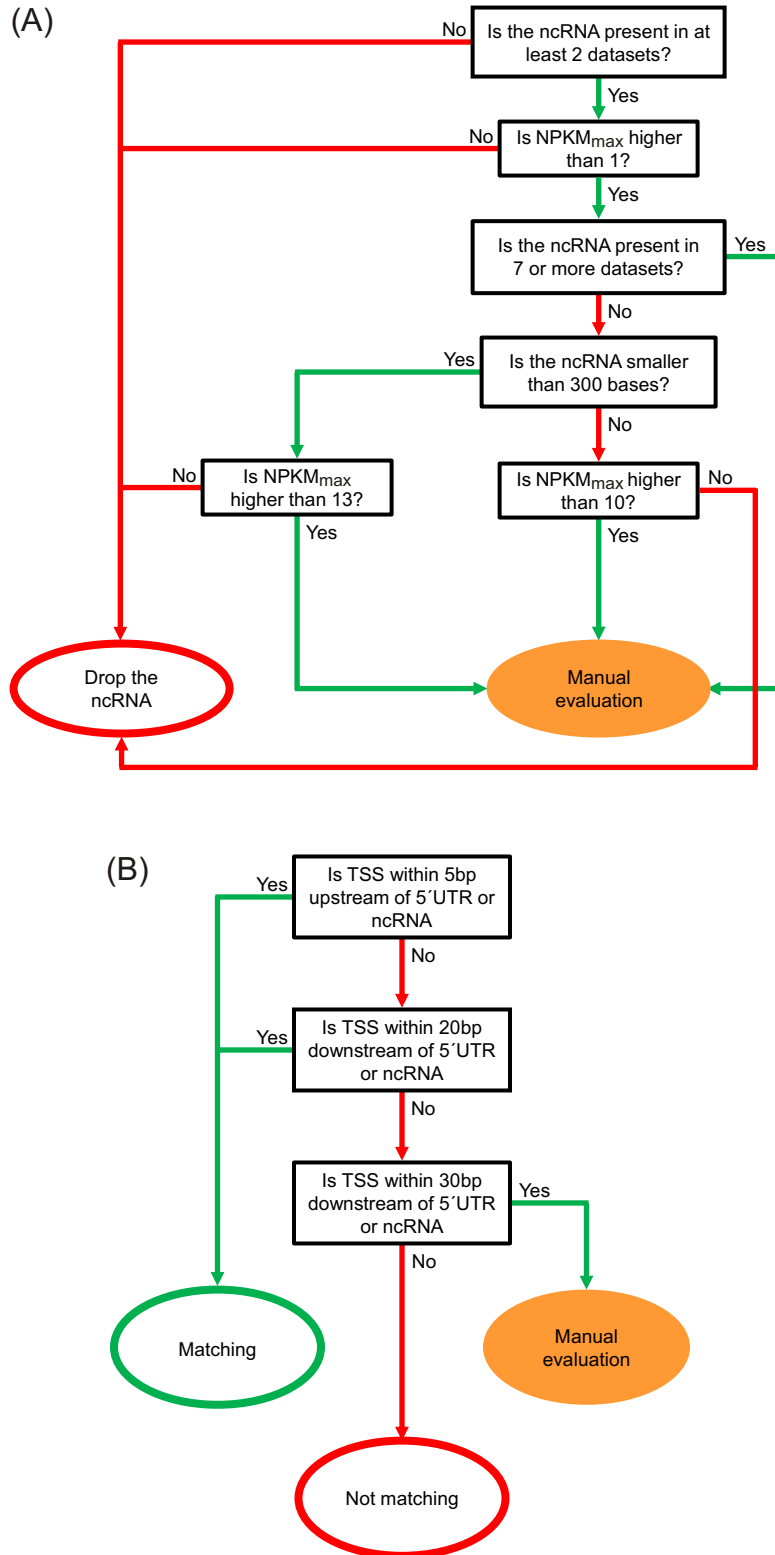

Figure S6 Work flow charts. (A) Work flow of non-coding RNA evaluation. (B) Work flow of transcription start site evaluation.



## References

1. Mao F, Dam P, Chou J, Olman V, Xu Y: **DOOR: a database for prokaryotic operons.** *Nucleic Acids Res* 2009, **37**:D459–63.
2. Murray EJ, Kiley TB, Stanley-Wall NR: **A pivotal role for the response regulator DegU in controlling multicellular behaviour.** *Microbiology+* 2009, **155**:1–8.
3. Hoffmann K, Wollherr A, Larsen M, Rachinger M, Liesegang H, Ehrenreich A, Meinhardt F: **Facilitation of direct conditional knockout of essential genes in *Bacillus licheniformis* DSM13 by comparative genetic analysis and manipulation of genetic competence.** *Appl Environ Microbiol* 2010, **76**:5046–57.
4. Davidson F, Seon-Yi C, Stanley-Wall N: **Selective Heterogeneity in Exoprotease Production by *Bacillus subtilis*.** *PLoS One* 2012, **7**:e38574.
5. Nicolas P, Mäder U, Dervyn E, Rochat T, Leduc A, Pigeonneau N, Bidnenko E, Marchadier E, Hoebeke M, Aymerich S, Becher D, Bisicchia P, Botella E, Delumeau O, Doherty G, Denham EL, Fogg MJ, Fromion V, Goelzer A, Hansen A, Hartig E, Harwood CR, Homuth G, Jarmer H, Jules M, Klipp E, Le Chat L, Lecointe F, Lewis P, Liebermeister W, et al.: **Condition-Dependent Transcriptome Reveals High-Level Regulatory Architecture in *Bacillus subtilis*.** *Science* 2012, **335**:1103–1106.
6. Darmon E, Noone D, Masson A, Bron S, Kuipers OP, Devine KM, van Dijl JM: **A Novel Class of Heat and Secretion Stress-Responsive Genes Is Controlled by the Autoregulated CsrRS Two-Component System of *Bacillus subtilis*.** *J Bacteriol* 2002, **184**:5661.
7. Marciniak BC, Trip H, van-der Veen PJ, Kuipers OP: **Comparative transcriptional analysis of *Bacillus subtilis* cells overproducing either secreted proteins, lipoproteins or membrane proteins.** *Microb Cell Fact* 2012, **11**:66.
8. Jahn N, Preis H, Wiedemann C, Brantl S: **BsrG/SR4 from *Bacillus subtilis*--the first temperature-dependent type I toxin-antitoxin system.** *Mol Microbiol* 2012, **83**:579–98.
